# Supplementary material
Source: PubMed Central journal article supplement (PMC2526252)
Supplement: NIHMS62490-supplement-si20070507_103.pdf [file NIHMS62490-supplement-si20070507_103.pdf]

## Supporting Information

Antitumor Agents 259. Design, Syntheses and Structure-Activity-Relationship  
Study of Desmosdumotin C Analogs

Kyoko Nakagawa-Goto,<sup>a</sup> Tzu-Hsuan Chen,<sup>a</sup> Chieh-Yu Peng,<sup>a</sup> Kenneth F. Bastow,<sup>b</sup>  
and Kuo-Hsiung Lee<sup>a,\*</sup>

<sup>a</sup>*Natural Products Research Laboratories, School of Pharmacy, University of North Carolina,  
Chapel Hill, NC 27599, USA*

<sup>b</sup>*Division of Medicinal Chemistry & Natural Products, School of Pharmacy, University of  
North Carolina, Chapel Hill, NC 27599, USA*

**Table S1. Analyses of Synthesized Compounds 7-15, 21-26 and 31-33**

| Cmpd | Formula                                                              | C%     |       | H%     |       | O%     |       |
|------|----------------------------------------------------------------------|--------|-------|--------|-------|--------|-------|
|      |                                                                      | Calcd. | Found | Calcd. | Found | Calcd. | Found |
| 7    | C <sub>19</sub> H <sub>19</sub> FO <sub>4</sub>                      | 69.08  | 68.94 | 5.80   | 5.82  | 19.37  | 19.66 |
| 8    | C <sub>20</sub> H <sub>22</sub> O <sub>4</sub>                       | 73.60  | 73.64 | 6.79   | 6.85  | 19.61  | 19.61 |
| 9    | C <sub>20</sub> H <sub>22</sub> O <sub>4</sub>                       | 73.60  | 73.59 | 6.79   | 6.74  | 19.61  | 19.71 |
| 10   | C <sub>21</sub> H <sub>24</sub> O                                    | 74.09  | 74.10 | 7.11   | 7.14  | 18.80  | 18.83 |
| 11   | C <sub>21</sub> H <sub>24</sub> O <sub>4</sub>                       | 74.09  | 74.37 | 7.11   | 7.25  | 18.80  | 18.60 |
| 12   | C <sub>21</sub> H <sub>24</sub> O <sub>4</sub>                       | 74.09  | 74.12 | 7.11   | 7.13  | 18.80  | 18.90 |
| 13   | C <sub>22</sub> H <sub>26</sub> O <sub>4</sub> ·1/8H <sub>2</sub> O  | 73.61  | 74.05 | 7.13   | 7.19  |        |       |
| 14   | C <sub>21</sub> H <sub>22</sub> O <sub>4</sub>                       | 74.54  | 74.38 | 6.55   | 6.65  | 18.91  | 19.13 |
| 15   | C <sub>23</sub> H <sub>22</sub> O <sub>4</sub>                       | 76.22  | 76.51 | 6.12   | 6.14  | 17.66  | 17.47 |
| 21   | C <sub>20</sub> H <sub>22</sub> O <sub>4</sub>                       | 73.60  | 73.46 | 6.79   | 6.80  | 19.61  | 19.87 |
| 22   | C <sub>22</sub> H <sub>26</sub> O <sub>4</sub>                       | 74.55  | 74.76 | 7.39   | 7.75  | 18.06  | 17.79 |
| 23   | C <sub>22</sub> H <sub>24</sub> O <sub>4</sub>                       | 74.98  | 74.84 | 6.86   | 6.72  |        |       |
| 24   | C <sub>24</sub> H <sub>30</sub> O <sub>4</sub>                       | 75.36  | 75.60 | 7.91   | 8.03  | 16.73  | 16.69 |
| 25   | C <sub>25</sub> H <sub>32</sub> O <sub>4</sub>                       | 75.73  | 75.88 | 8.13   | 8.17  | 16.14  | 16.25 |
| 26   | C <sub>25</sub> H <sub>31</sub> O <sub>4</sub> Br                    | 63.16  | 63.22 | 6.57   | 6.59  | 13.46  | 13.46 |
| 31   | C <sub>12</sub> H <sub>16</sub> O <sub>4</sub> ·1/8H <sub>2</sub> O  | 63.63  | 63.82 | 7.23   | 7.17  | 29.14  | 28.90 |
| 32   | C <sub>21</sub> H <sub>22</sub> O <sub>4</sub> ·1/16H <sub>2</sub> O | 66.35  | 66.59 | 8.00   | 8.03  | 25.65  | 25.35 |
| 33   | C <sub>17</sub> H <sub>26</sub> O <sub>4</sub>                       | 69.36  | 69.20 | 8.90   | 8.87  |        |       |
